# Supplementary material for: Cell membrane mimetic films immobilized by synergistic grafting and crosslinking
Source: Royal Society of Chemistry journal article supplement (doi:10.1039/c3sm00086a), 2013-01-01
Supplement: c3sm00086a.pdf [file c3sm00086a.pdf]

Electronic Supplementary Information (ESI):

Supporting information for *Soft Matter*: DOI: 10.1039/c3sm00086a.

## Cell membrane mimetic films immobilized by synergistic grafting and crosslinking

Ming Gong,<sup>a,b</sup> Yuan Dang,<sup>a</sup> Yan-Bing Wang,<sup>a</sup> Shan Yang,<sup>a,c</sup> Françoise M. Winnik<sup>d,e</sup> and Yong-Kuan Gong\*<sup>a</sup>

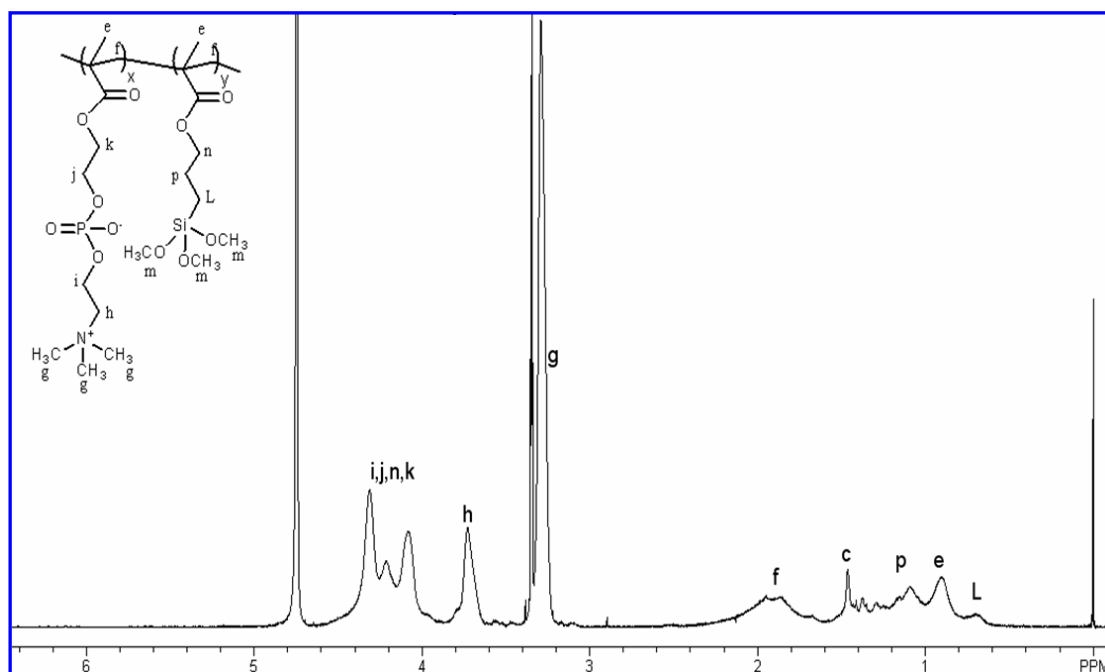

**Figure S1.** <sup>1</sup>H-NMR spectrum of PMT14 in D<sub>2</sub>O using an INOVA-400MHz NMR spectrometer

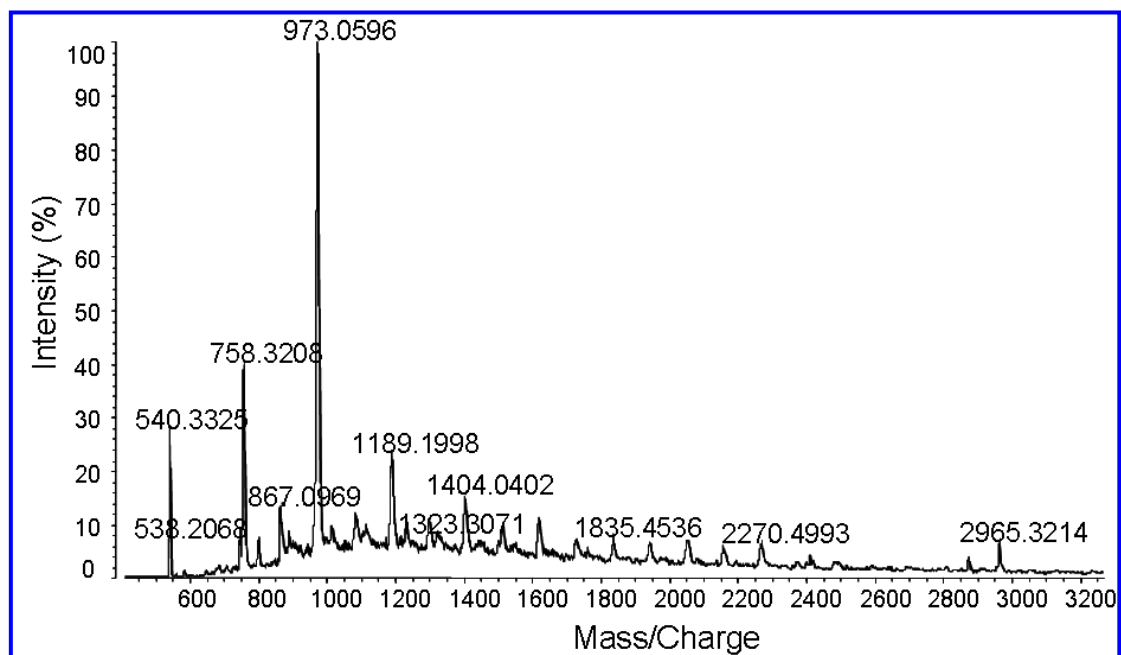

**Figure S2.** MALDI-TOF-MS spectrum of PMT14 using an AXIMA-CFR plus MALDI-TOF mass spectrometer.
